# Supplementary material for: Expression of Endogenous Putative TSH Binding Protein in Orbit
Source: MDPI journal article supplement (doi:10.3390/cimb43030126), 2021-10-27
Supplement: s1 [file s1]

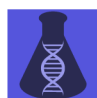

Supplementary Materials

# Expression of Endogenous Putative TSH Binding Protein in Orbit

Mohd Shazli Draman <sup>1,2</sup>, Fiona Grennan-Jones <sup>1</sup>, Peter Taylor <sup>1</sup>, Ilaria Muller <sup>1,3,4</sup>, Sam Evans <sup>5</sup>, Anjana Haridas <sup>5</sup>, Daniel S. Morris <sup>5</sup>, D. Aled Rees <sup>1</sup>, Carol Lane <sup>5</sup>, Colin Dayan <sup>1</sup>, Lei Zhang <sup>1,\*</sup>† and Marian Ludgate <sup>1,†</sup>

<sup>1</sup> School of Medicine, Cardiff University, Heath Park, Cardiff CF14 4XN, UK;

shazlidraman@gmail.com (M.S.D.); grennanjonesfa@icloud.com (F.G.-J.); taylorpn@cardiff.ac.uk (P.T.);  
ilaria.muller@unimi.it (I.M.); ReesDA@cardiff.ac.uk (D.A.R.); DayanCM@cardiff.ac.uk (C.D.)

<sup>2</sup> KPJ Healthcare University College, Kota Seriemas, Nilai 71800, Negeri Sembilan, Malaysia

<sup>3</sup> Department of Clinical Sciences and Community Health, University of Milan, 20122 Milan, Italy

<sup>4</sup> Department of Endocrinology, Fondazione IRCCS Ca' Granda Ospedale Maggiore Policlinico, 28-20122 Milan, Italy

<sup>5</sup> Department of Ophthalmology, Cardiff & Vale University Health Board, Cardiff CF14 4XW, UK;

samboevans@mac.com (S.E.); anjana@doctors.org.uk (A.H.); dsm@doctors.org.uk (D.M.);  
carollanedm@gmail.com (C.L.)

\* Correspondence: zhangL14@cf.ac.uk; Tel.: +44-292-074-2343; Fax: +44-292-0744-671

† These authors joint senior author.

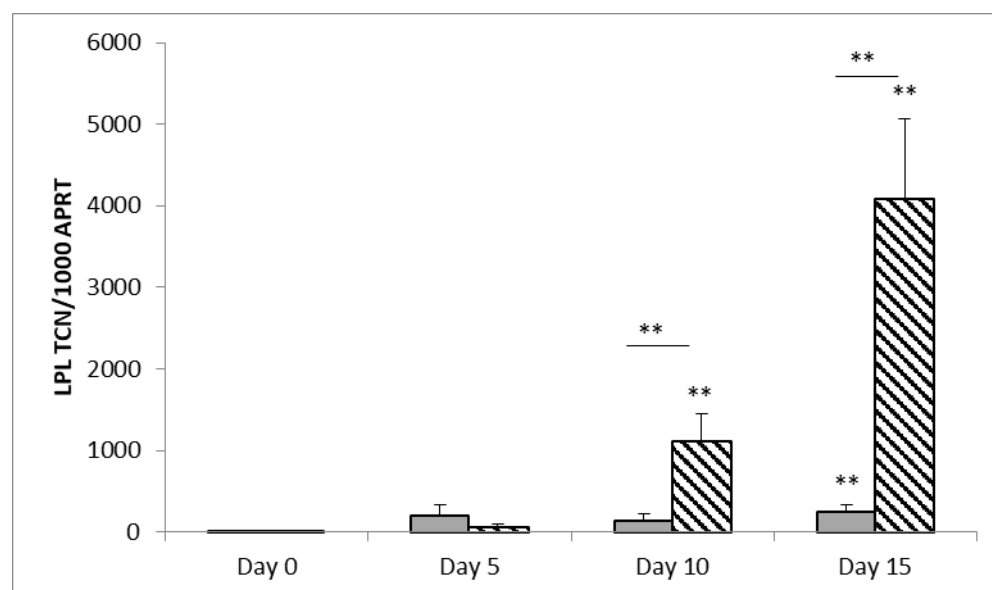

**Supplementary Figure S1.** Marker of adipogenesis Lipoprotein lipase (*LPL*) transcripts were measured in orbital preadipocyte-fibroblasts (OF) from patients with Graves' orbitopathy (GO) (Stippled bar,  $n = 5$ ) and non-GO (grey bar,  $n = 5$ ) at various time points at baseline (Day 0) and during adipogenesis (Day 5, 10, 15). Results are presented as *LPL* transcript copy number per 1000 copies of the housekeeper *APRT*. Results are expressed as mean  $\pm$  SEM; \*\*  $p$ -value  $< 0.01$  compared to day 0 on each respective day; horizontal bar represent comparison between non-GO and GO.

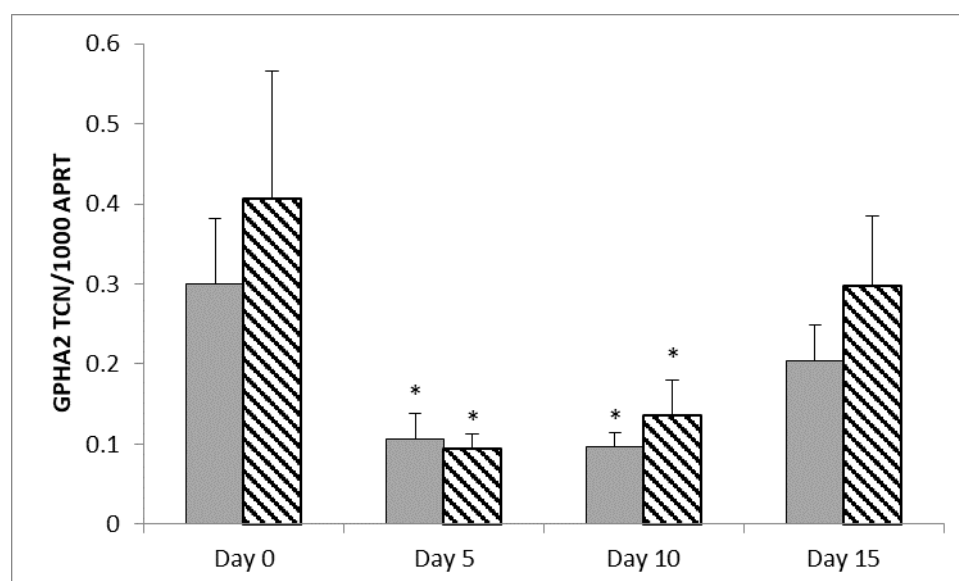

**Supplementary Figure S2.** Transcripts for the *thyrostimulin*  $\alpha 2$  subunit were measured in OF from patients with GO (Stippled bar,  $n = 5$ ) and non-GO (grey bar,  $n = 5$ ) at various time points before (Day 0) and during adipogenesis (Day 5, 10, 15). Results are expressed as transcript copy number of  $\alpha 2$  per 1000 copies of the housekeeper *APRT*. Results are presented as mean  $\pm$  SEM; \*  $p$ -value  $< 0.05$  for days 5, 10, 15 compared to equivalent day 0 for GO or non-GO.

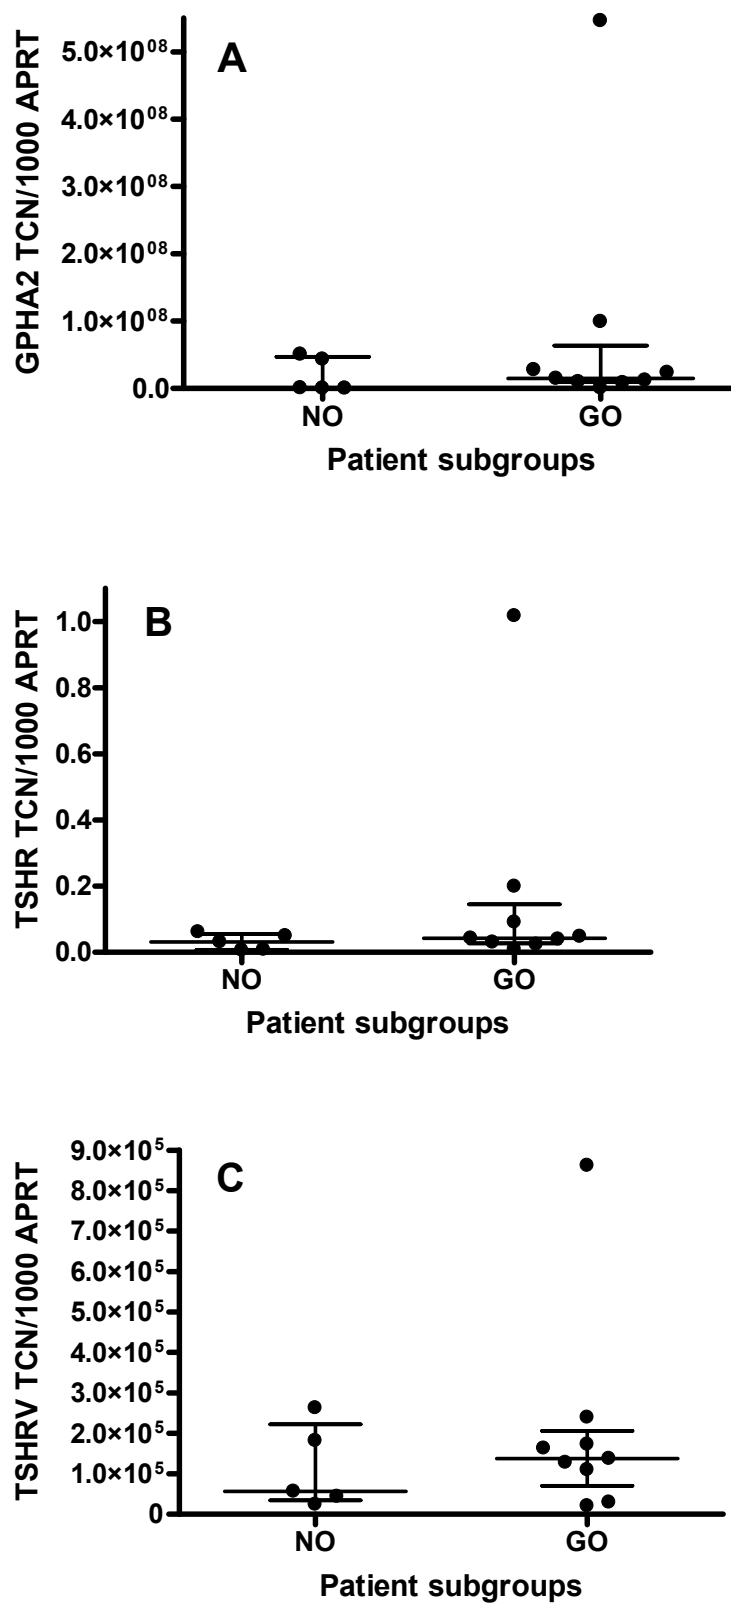

**Supplementary Figure S3.** Ex vivo analysis of orbital adipose tissue from non-GO individuals (NO,  $n = 5$ ) and patients with GO ( $n = 9$ ) for transcripts of A, *thyrostimulin*  $\alpha 2$  subunit; B, *TSHR*; C, the *TSHRV*. Results are expressed as transcript copy number per 1000 copies of the housekeeper *APRT*. Results are presented as median  $\pm$  interquartile range.

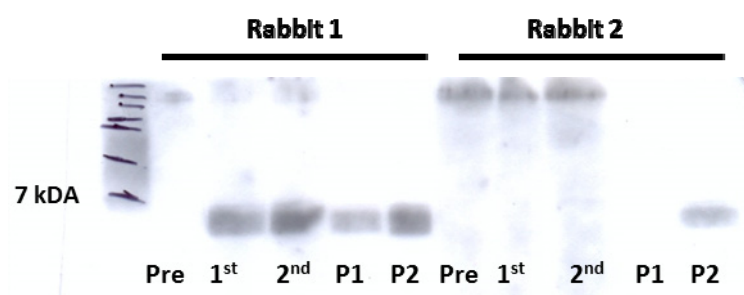

**Supplementary Figure S4.** Successful generation of antibody to unique TSHRv peptide.

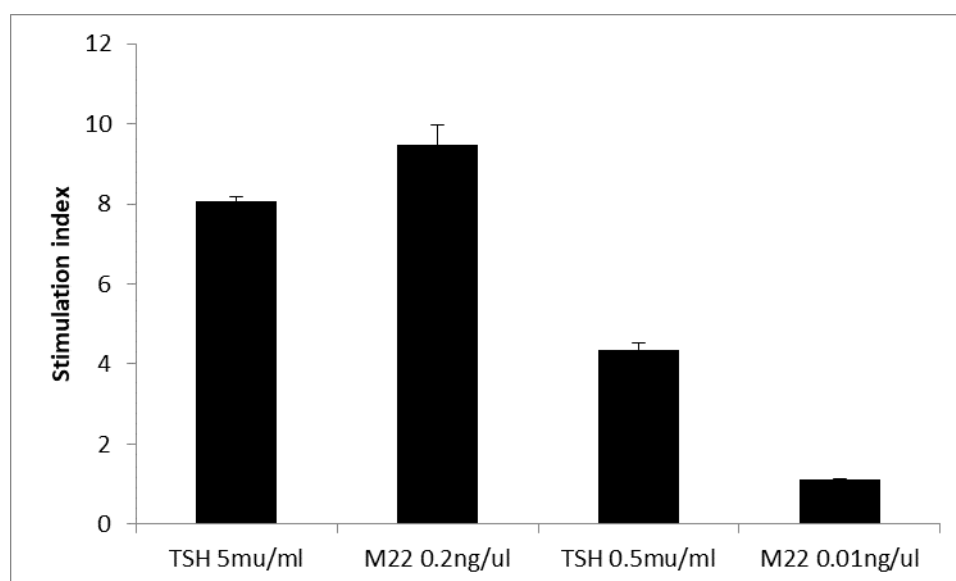

**Supplementary Figure S5.** Luminescent bioassay to measure cAMP following TSHR activation. Stimulation index in the presence of varying doses of TSH and monoclonal TSAB M22.
